# Supplementary material for: Dispersity, mesoporous structure and particle size modulation of hollow mesoporous silica nanoparticles with excellent adsorption performance
Source: Royal Society of Chemistry journal article supplement (doi:10.1039/c8dt01940a), 2018-01-01
Supplement: c8dt01940a1.pdf [file c8dt01940a1.pdf]

## Dispersity, mesoporous structure and particle size modulation of hollow mesoporous silica nanoparticles with excellent adsorption performance

Guiju Tao,<sup>a</sup> Wenjun He,<sup>a</sup> Yu Wang,<sup>a</sup> Fengping Yu,<sup>a</sup> Junwei Ge<sup>a</sup> and Weimin Yang<sup>\*a</sup>

<sup>a</sup>State Key Laboratory of Green Chemical Engineering and Industrial Catalysis, SINOPEC Shanghai Research Institute of Petrochemical Technology, Shanghai 201208, China

\* To whom correspondence should be addressed

Email: yangwm.sshy@sinopec.com (Prof. Weimin Yang)

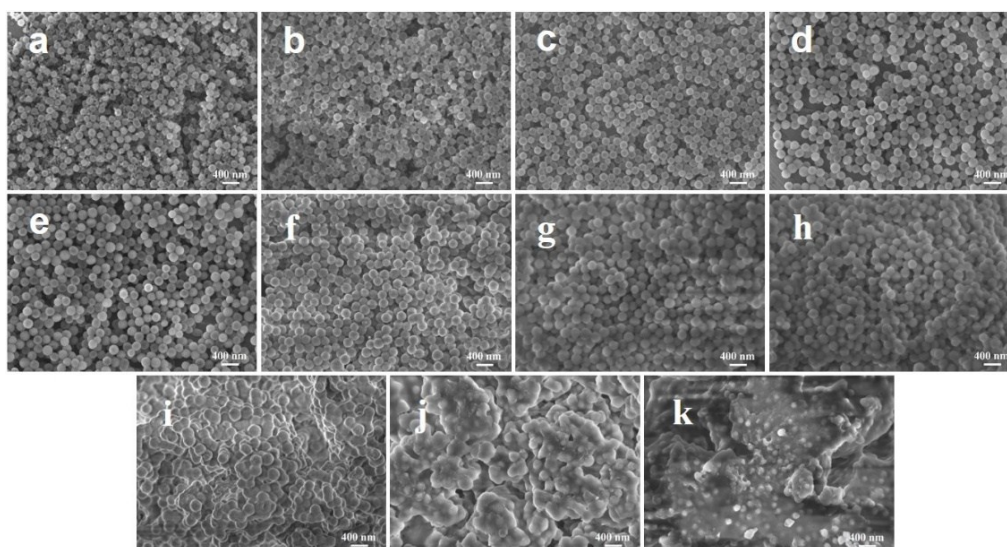

**Figure S1** Low magnification SEM images of HMSNs-as-C<sub>n</sub> (a: C<sub>1.00</sub>, b: C<sub>1.25</sub>, c: C<sub>1.50</sub>, d: C<sub>1.75</sub>, e: C<sub>2.00</sub>, f: C<sub>2.25</sub>, g: C<sub>2.50</sub>, h: C<sub>2.75</sub>, i: C<sub>3.00</sub>, j: C<sub>3.25</sub> and k: C<sub>3.50</sub>) obtained with the volume of core-etching agent as 100 mL and etching time as 0.5 h.

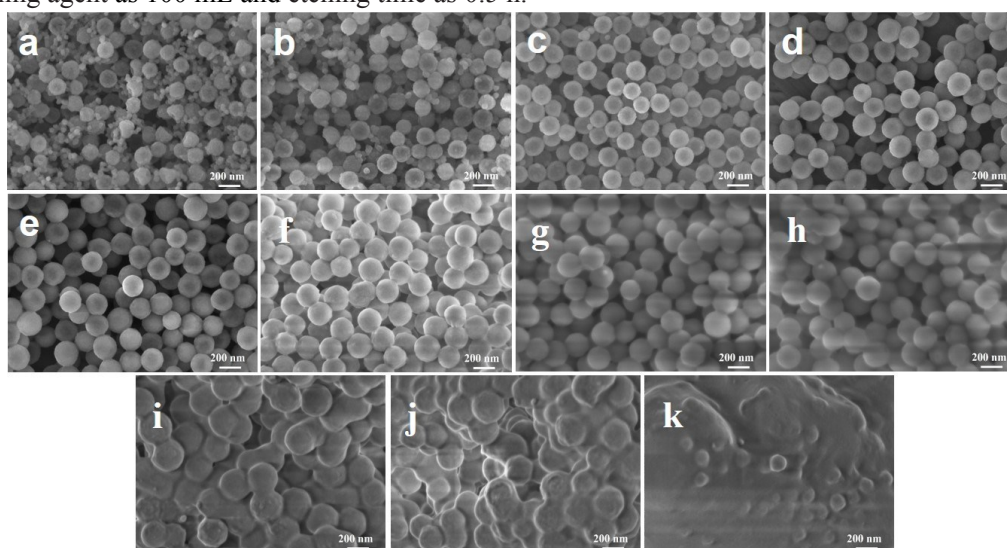

**Figure S2** High magnification SEM images of HMSNs-as-C<sub>n</sub> (a: C<sub>1.00</sub>, b: C<sub>1.25</sub>, c: C<sub>1.50</sub>, d: C<sub>1.75</sub>, e: C<sub>2.00</sub>, f: C<sub>2.25</sub>, g: C<sub>2.50</sub>, h: C<sub>2.75</sub>, i: C<sub>3.00</sub>, j: C<sub>3.25</sub> and k: C<sub>3.50</sub>) obtained with the volume of core-etching agent as 100 mL and etching time as 0.5 h.

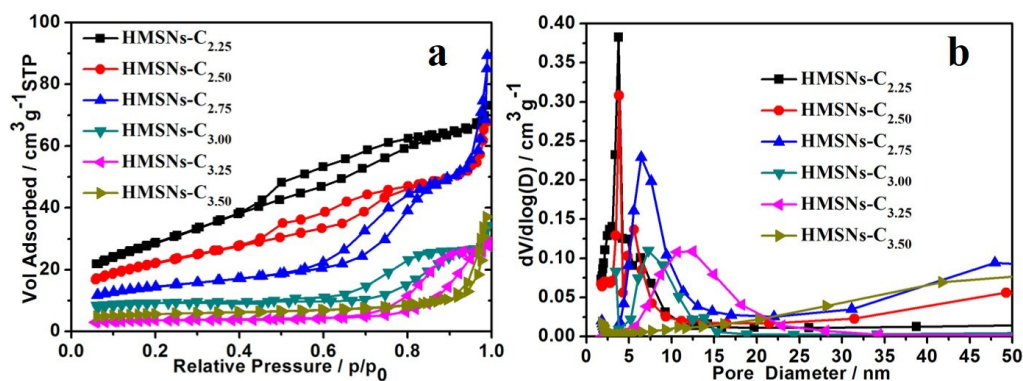

**Figure S3**  $N_2$  adsorption-desorption isotherms (a) and their corresponding pore size distributions (b) of HMSNs- $C_n$  ( $C_{2.25} \leq C_n \leq C_{3.50}$ ) obtained with the volume of core-etching agent as 100 mL and etching time as 0.5 h.

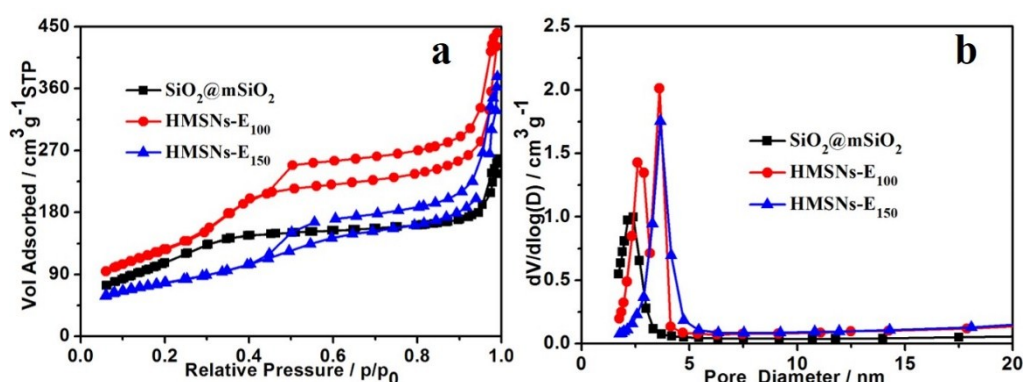

**Figure S4**  $N_2$  adsorption-desorption isotherms (a) and their corresponding pore size distributions (b) of  $SiO_2@mSiO_2$ , HMSNs- $E_{100}$  and HMSNs- $E_{150}$  obtained with the volume of  $C_{18}TMS$  as 1.50 mL and etching time as 0.5 h.

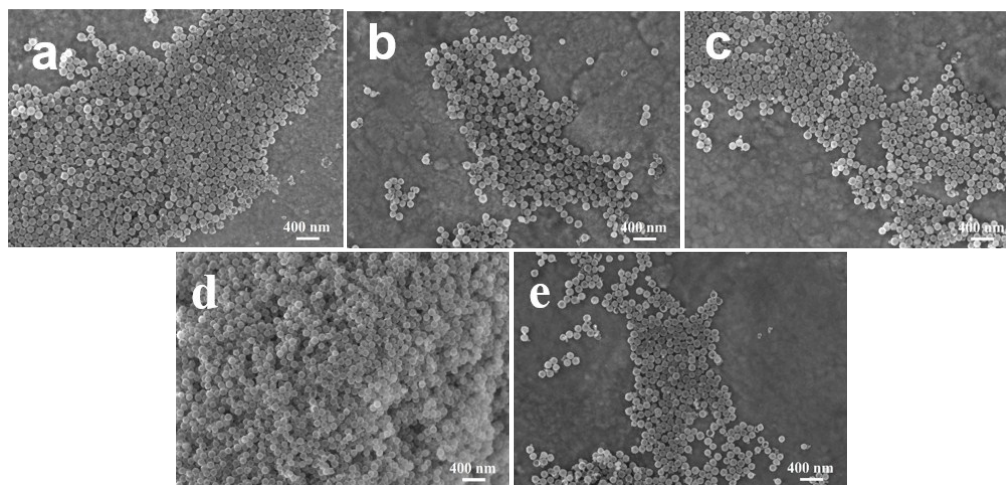

**Figure S5** Low magnification SEM images of HMSNs- $T_n$  (a:  $T_{0.5}$ , b:  $T_{1.5}$ , c:  $T_{2.5}$ , d:  $T_{3.5}$  and e:  $T_{4.5}$ ) obtained with the volume of  $C_{18}TMS$  and core-etching agent as 1.50 and 150 mL, respectively.



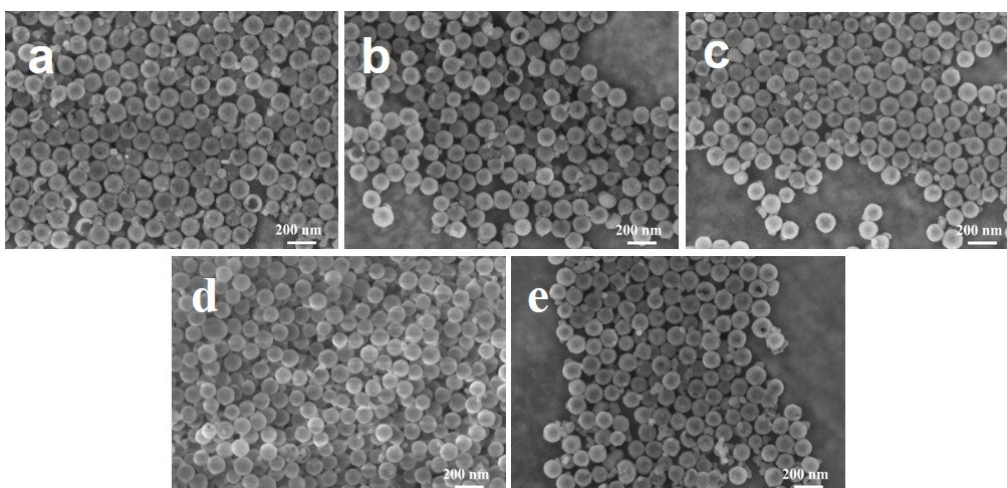

**Figure S6** High magnification SEM images of HMSNs- $T_n$  (a:  $T_{0.5}$ , b:  $T_{1.5}$ , c:  $T_{2.5}$ , d:  $T_{3.5}$  and e:  $T_{4.5}$ ) obtained with the volume of  $C_{18}TMS$  and core-etching agent as 1.50 and 150 mL, respectively.

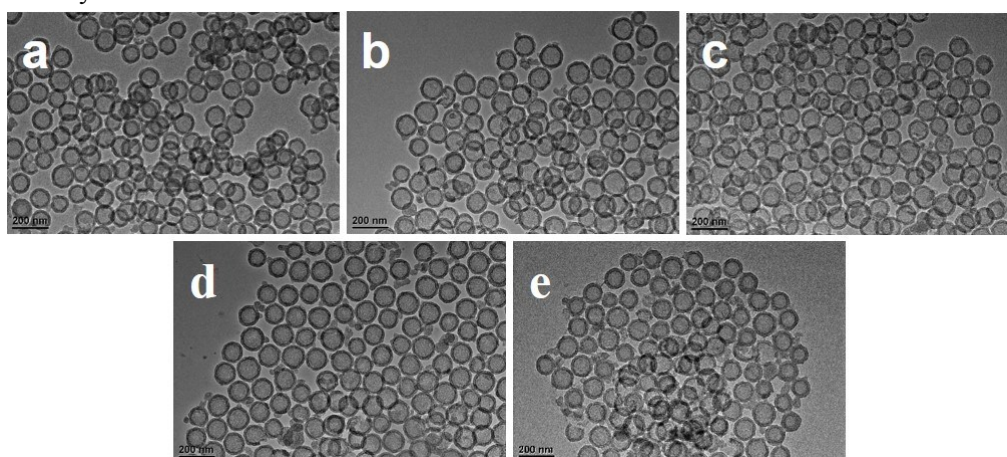

**Figure S7** Low magnification TEM images of HMSNs- $T_n$  (a:  $T_{0.5}$ , b:  $T_{1.5}$ , c:  $T_{2.5}$ , d:  $T_{3.5}$  and e:  $T_{4.5}$ ) obtained with the volume of  $C_{18}TMS$  and core-etching agent as 1.50 and 150 mL, respectively.

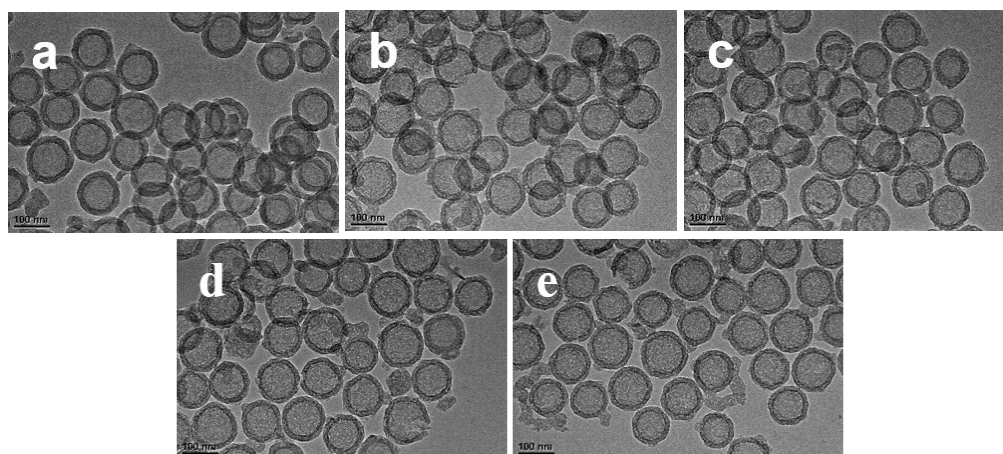

**Figure S8** High magnification TEM images of HMSNs- $T_n$  (a:  $T_{0.5}$ , b:  $T_{1.5}$ , c:  $T_{2.5}$ , d:  $T_{3.5}$  and e:  $T_{4.5}$ ) obtained with the volume of  $C_{18}TMS$  and core-etching agent as 1.50 and 150 mL, respectively.

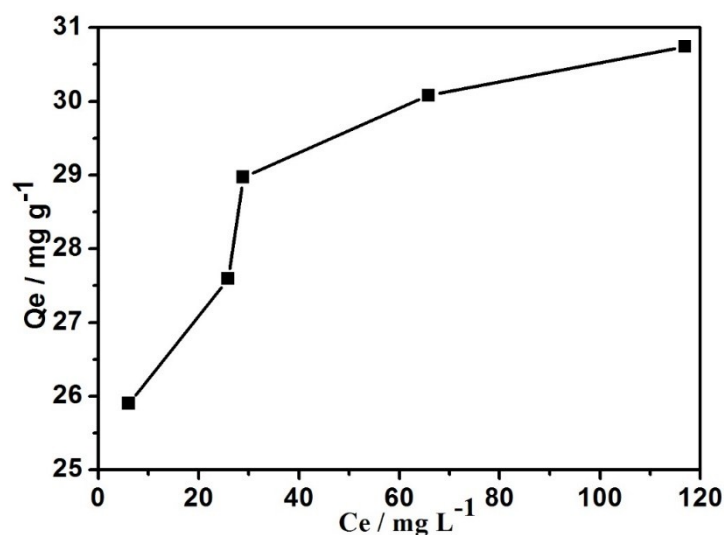

Figure S9 The adsorption isotherm of MB on HMSNs-T<sub>1.5</sub>.

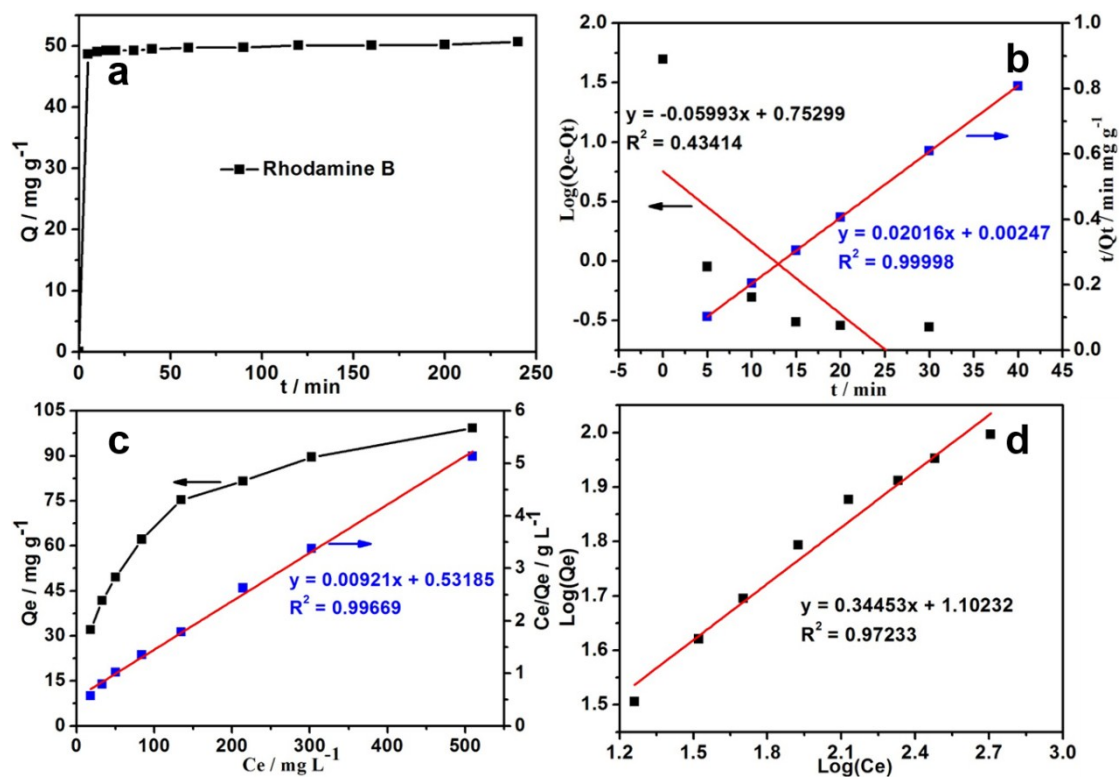

Figure S10 The adsorption kinetic curve of Rhodamine B (RB) on HMSNs-T<sub>1.5</sub> (a), kinetic data of RB adsorption on HMSNs-T<sub>1.5</sub> evaluated using pseudo-first-order model and pseudo-second-order model (b), adsorption isotherm and Langmuir isotherm of RB on HMSNs-T<sub>1.5</sub> (c) and Freundlich isotherm of RB on HMSNs-T<sub>1.5</sub> (d).

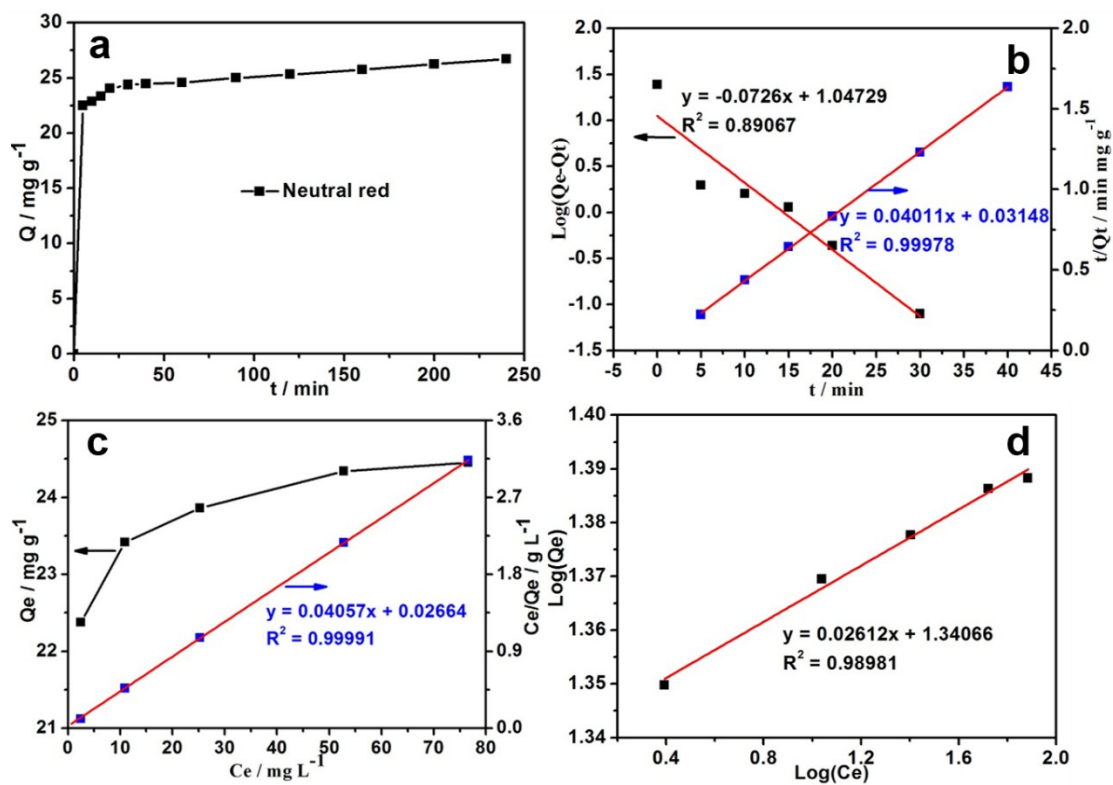

**Figure S11** The adsorption kinetic curve of Neutral red (NR) on HMSNs-T<sub>1.5</sub> (a), kinetic data of NR adsorption on HMSNs-T<sub>1.5</sub> evaluated using pseudo-first-order model and pseudo-second-order model (b), adsorption isotherm and Langmuir isotherm of NR on HMSNs-T<sub>1.5</sub> (c) and Freundlich isotherm of NR on HMSNs-T<sub>1.5</sub> (d).

**Table S1** Comparison between the reported representative synthetic methods for preparing HMSNs and our method.

| Method                 | Characteristic                                                                                                                                 | Advantages                                                                                                                                                                                                                                                                                                             | Disadvantages                                                                                                                            |
|------------------------|------------------------------------------------------------------------------------------------------------------------------------------------|------------------------------------------------------------------------------------------------------------------------------------------------------------------------------------------------------------------------------------------------------------------------------------------------------------------------|------------------------------------------------------------------------------------------------------------------------------------------|
| Soft-templating method | Micelle, vesicle or gas bubbles as the core template. <sup>1</sup>                                                                             | The synthetic process is relatively simpler.                                                                                                                                                                                                                                                                           | It is very difficult to control particle/pore size, morphology and dispersity of HMSNs at nanoscale.                                     |
|                        | Non-silicate particle (such as PS, PTBA and carbon spheres) as the core template. <sup>2-4</sup>                                               | The core template and mesopore template can be removed at the same time by calcination <sup>2-4</sup> or even extraction. <sup>2, 3</sup>                                                                                                                                                                              | It is time-consuming or expensive to obtain highly dispersed core template.                                                              |
| Hard-templating method | SiO <sub>2</sub> nanoparticle as the core template, CTAB as the mesopore template. <sup>5,6</sup>                                              | The mesopore template CTAB can be removed by either calcination or extraction. <sup>5, 6</sup> The core template SiO <sub>2</sub> nanoparticle also works as the silica source for shell formation and don't need to be removed or the pore channels are aligned perpendicularly to the surface of HMSNs. <sup>6</sup> | The synthetic process is relatively complex and time-consuming.                                                                          |
|                        | SiO <sub>2</sub> nanoparticle as the core template, C <sub>18</sub> TMS as both the mesopore template and silica source ( <b>our method</b> ). | The synthetic process is simple. HMSNs with different dispersity, mesoporous structures and particle sizes can be obtained simply by changing C <sub>18</sub> TMS percentage.                                                                                                                                          | The core template and mesopore template can't be removed at the same time, and the mesopore template can only be removed by calcination. |

**Table S2** Experimental parameters and texture properties of HMSNs.

| Sample                                                 | V <sub>C18TMS</sub><br>(mL) | V <sub>Na2CO3</sub><br>(mL) | T <sub>etching</sub><br>(h) | S <sub>BET</sub><br>(m <sup>2</sup> g <sup>-1</sup> ) | V <sub>BJH</sub><br>(cm <sup>3</sup> g <sup>-1</sup> ) | D <sub>BJH</sub><br>(nm) |
|--------------------------------------------------------|-----------------------------|-----------------------------|-----------------------------|-------------------------------------------------------|--------------------------------------------------------|--------------------------|
| HMSNs-C <sub>1.00</sub>                                | 1.00                        | 100                         | 0.5                         | 503                                                   | 0.89                                                   | 2.90                     |
| HMSNs-C <sub>1.25</sub>                                | 1.25                        | 100                         | 0.5                         | 535                                                   | 0.79                                                   | 2.62, 3.66               |
| HMSNs-C <sub>1.50</sub> (E <sub>100</sub> )            | 1.50                        | 100                         | 0.5                         | 466                                                   | 0.68                                                   | 2.62, 3.60               |
| HMSNs-C <sub>1.75</sub>                                | 1.75                        | 100                         | 0.5                         | 238                                                   | 0.46                                                   | 4.07                     |
| HMSNs-C <sub>2.00</sub>                                | 2.00                        | 100                         | 0.5                         | 144                                                   | 0.37                                                   | 5.34                     |
| HMSNs-C <sub>2.25</sub>                                | 2.25                        | 100                         | 0.5                         | 104                                                   | 0.11                                                   | 3.78                     |
| HMSNs-C <sub>2.50</sub>                                | 2.50                        | 100                         | 0.5                         | 79.7                                                  | 0.10                                                   | 3.84, 5.60               |
| HMSNs-C <sub>2.75</sub>                                | 2.75                        | 100                         | 0.5                         | 51.3                                                  | 0.14                                                   | 6.41                     |
| HMSNs-C <sub>3.00</sub>                                | 3.00                        | 100                         | 0.5                         | 32.7                                                  | 0.05                                                   | 7.28                     |
| HMSNs-C <sub>3.25</sub>                                | 3.25                        | 100                         | 0.5                         | 12.8                                                  | 0.04                                                   | 11.54                    |
| HMSNs-C <sub>3.50</sub>                                | 3.50                        | 100                         | 0.5                         | 19.9                                                  | 0.06                                                   | ~                        |
| SiO <sub>2</sub> @mSiO <sub>2</sub> -C <sub>1.50</sub> | 1.50                        | 0                           | 0                           | 403                                                   | 0.40                                                   | 2.34                     |
| HMSNs-E <sub>150</sub> (T <sub>0.5</sub> )             | 1.50                        | 150                         | 0.5                         | 282                                                   | 0.58                                                   | 3.65                     |
| HMSNs-T <sub>1.5</sub>                                 | 1.50                        | 150                         | 1.5                         | 282                                                   | 0.78                                                   | 4.12                     |
| HMSNs-T <sub>2.5</sub>                                 | 1.50                        | 150                         | 2.5                         | 274                                                   | 0.69                                                   | 3.71                     |
| HMSNs-T <sub>3.5</sub>                                 | 1.50                        | 150                         | 3.5                         | 250                                                   | 0.76                                                   | 4.05                     |
| HMSNs-T <sub>4.5</sub>                                 | 1.50                        | 150                         | 4.5                         | 227                                                   | 0.66                                                   | 4.65                     |

**Table S3** Adsorption isotherm parameters by Langmuir and Freundlich models of RB on HMSNs-T<sub>1.5</sub>.

| Q <sub>m</sub> [mg g <sup>-1</sup> ] | Langmuir isotherm model             |                                                                |                | Freundlich isotherm model            |         |                |
|--------------------------------------|-------------------------------------|----------------------------------------------------------------|----------------|--------------------------------------|---------|----------------|
|                                      | K <sub>L</sub> [L g <sup>-1</sup> ] | R <sub>L</sub> (C <sub>0</sub> = 50 - 608 mg L <sup>-1</sup> ) | R <sup>2</sup> | K <sub>F</sub> [mg g <sup>-1</sup> ] | 1/n     | R <sup>2</sup> |
| 108.6                                | 0.01732                             | 0.087 - 0.53                                                   | 0.9966<br>9    | 12.66                                | 0.34453 | 0.9723<br>3    |

**Table S4** Adsorption isotherm parameters by Langmuir and Freundlich models of NR on HMSNs-T<sub>1.5</sub>.

| Q <sub>m</sub> [mg g <sup>-1</sup> ] | Langmuir isotherm model             |                                                                |                | Freundlich isotherm model            |         |                |
|--------------------------------------|-------------------------------------|----------------------------------------------------------------|----------------|--------------------------------------|---------|----------------|
|                                      | K <sub>L</sub> [L g <sup>-1</sup> ] | R <sub>L</sub> (C <sub>0</sub> = 25 - 100 mg L <sup>-1</sup> ) | R <sup>2</sup> | K <sub>F</sub> [mg g <sup>-1</sup> ] | 1/n     | R <sup>2</sup> |
| 24.65                                | 1.522                               | 0.0065 - 0.026                                                 | 0.99999<br>1   | 21.91                                | 0.02612 | 0.9898<br>1    |

**Table S5** Kinetic parameters of RB adsorption on HMSNs-T<sub>1.5</sub> by pseudo-first-order and pseudo-second-order models.

| C <sub>0</sub> [mg L <sup>-1</sup> ] | Experimental                         | Pseudo-first-order                  |                                         |                | Pseudo-second-order                                    |                                         |                |
|--------------------------------------|--------------------------------------|-------------------------------------|-----------------------------------------|----------------|--------------------------------------------------------|-----------------------------------------|----------------|
|                                      | Q <sub>e</sub> [mg g <sup>-1</sup> ] | k <sub>1</sub> [min <sup>-1</sup> ] | Q <sub>1cal</sub> [mg g <sup>-1</sup> ] | R <sup>2</sup> | k <sub>2</sub> [g mg <sup>-1</sup> min <sup>-1</sup> ] | Q <sub>2cal</sub> [mg g <sup>-1</sup> ] | R <sup>2</sup> |
| 100                                  | 49.53                                | 0.138                               | 5.66                                    | 0.4341         | 0.164                                                  | 49.60                                   | 0.99998        |

**Table S6** Kinetic parameters of NR adsorption on HMSNs-T<sub>1.5</sub> by pseudo-first-order and pseudo-second-order models.

| C <sub>0</sub> [mg L <sup>-1</sup> ] | Experimental                         | Pseudo-first-order                  |                                         |                | Pseudo-second-order                                    |                                         |                |
|--------------------------------------|--------------------------------------|-------------------------------------|-----------------------------------------|----------------|--------------------------------------------------------|-----------------------------------------|----------------|
|                                      | Q <sub>e</sub> [mg g <sup>-1</sup> ] | k <sub>1</sub> [min <sup>-1</sup> ] | Q <sub>1cal</sub> [mg g <sup>-1</sup> ] | R <sup>2</sup> | k <sub>2</sub> [g mg <sup>-1</sup> min <sup>-1</sup> ] | Q <sub>2cal</sub> [mg g <sup>-1</sup> ] | R <sup>2</sup> |
| 100                                  | 24.45                                | 0.167                               | 11.15                                   | 0.8907         | 0.0511                                                 | 24.93                                   | 0.99978        |

## References

- 1 Y. S. Li and J. L. Shi, *Adv Mater*, 2014, **26**, 3176-3205.
- 2 Y. Jiao, J. Guo, S. Shen, B. Chang, Y. Zhang, X. Jiang and W. Yang, *J Mater Chem*, 2012, **22**, 17636-17643.
- 3 H. Blas, M. Save, P. Pasetto, C. Boissière, C. Sanchez and B. Charleux, *Langmuir*, 2008, **24**, 13132-13137.
- 4 Y. Zhu, E. Kockrick, T. Ikoma, N. Hanagata and S. Kaskel, *Chem Mater*, 2009, **21**, 2547-2553.
- 5 Y. Chen, H. Chen, Y. Sun, Y. Zheng, D. Zeng, F. Li, S. Zhang, X. Wang, K. Zhang, M. Ma, Q. He, L. Zhang and J. Shi, *Angew Chem Int Edit*, 2011, **50**, 12505-12509.
- 6 X. Fang, C. Chen, Z. Liu, P. Liu and N. Zheng, *Nanoscale*, 2011, **3**, 1632-1639.
